# Supplementary material for: Inkjet printed patterned bank structure with encapsulated perovskite colour filters for modern display
Source: Royal Society of Chemistry journal article supplement (doi:10.1039/d2nr00849a), 2022-01-01
Supplement: d2nr00849a1.pdf [file d2nr00849a1.pdf]

## Supporting information

# Inkjet Printed Patterned Bank Structure with Encapsulated Perovskite Colour Filters for Modern Display

Chengbin Kang#1, Zhicong Zhou#2, Jonathan E. Halpert\*2, Abhishek K. Srivastava\*1

1. State Key Laboratory of Advanced Displays and Optoelectronics Technologies Department of Electronic and Computer Engineering, Hong Kong University of Science and Technology, Hong Kong SAR, China
2. Department of Chemistry, Hong Kong University of Science and Technology, Hong Kong SAR, China

1. Performance of ink system: Mixing LCM with OLA/OA-capped perovskite nanocrystals, a severe aggregation happened in their mixing solution which prevents the printing process (Figure S1(a)). However, HPA-capped CsPbBr<sub>3</sub> and LCM mixed solution were still clear under a relatively high concentration of 10 mg/mL (Figure S1(b)), showing that it has stronger binding ligands which leads to a better dispersion. The effective attachment of LCM to the surface ligands of HPA-CsPbBr<sub>3</sub> is one of the reasons to avoid severe aggregation.

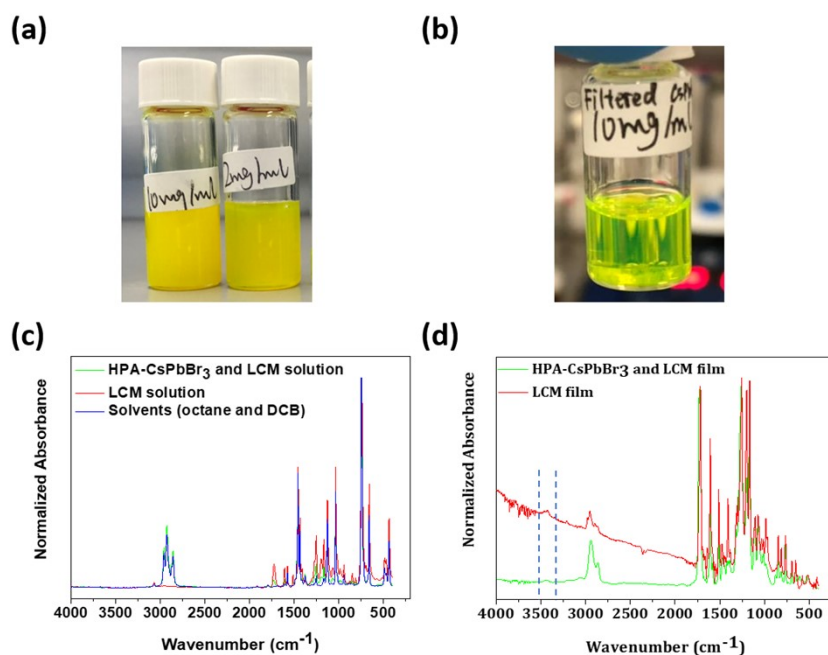

Figure S1. (a) Pictures of 10 mg/mL and 2 mg/mL OA-CsPbBr<sub>3</sub> after mixing with LCM solution (b) Picture of 10 mg/mL HPA-CsPbBr<sub>3</sub> after mixing with LCM solution. (c) FTIR of HPA-CsPbBr<sub>3</sub> and LCM in solution phase. (d) FTIR of HPA-CsPbBr<sub>3</sub> and LCM in solid phase.

2. Summary of optical properties of CsPbBr<sub>3</sub> and CsPbBr<sub>1.2</sub> nanocrystals

|                          | Green perovskite | Red perovskite |
|--------------------------|------------------|----------------|
| Solution PLQY (ex 450nm) | 90%              | 70%            |
| Film PLQY (ex 450nm)     | 53%              | 27%            |
| Photoluminescence/nm     | 513              | 630            |
| FWHM /nm                 | 20               | 32             |

3. Modified inkjet printer waveform for the low viscosity ink used for green and red ink composition printing: By

applying a multistep negative section in the waveform instead of the continuous slope, so that the end face of the liquid thread remained in contact with nozzles and flew back during the negative section. It has been found that the negative slope with 15 steps offers the optimal jetting for all the chosen ink formulations with an inverse Ohnesorge number larger than 14. (without any satellite drops)[1]

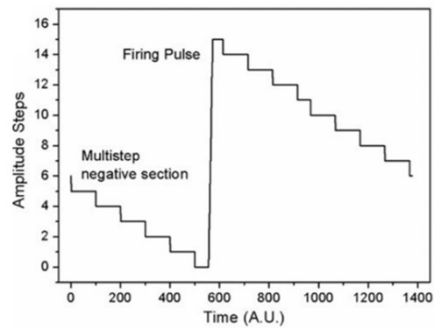

Figure S2 : Waveform of negative slope with 15 steps used in printing

**Reference:**

- [1] S. K. Gupta et al., "Inkjet-printed aligned quantum rod enhancement films for their application in liquid crystal displays," (in English), *Nanoscale*, vol. 11, no. 43, pp. 20837-20846, Nov 21 2019.
